# Supplementary material for: Impacts of the invasive species Caulerpa cylindracea Sonder, 1845 on the algae flora of the west coast of Algeria
Source: Biodivers Data J. 2021 May 26;9:e64535. doi: 10.3897/BDJ.9.e64535 (PMC8175330; doi:10.3897/BDJ.9.e64535)
Supplement: Supplementary material 1 — average recovery: Salamandre Station [file bdj-09-e64535-s001.csv]

Esp�ce	code	mars	nouv	juin	RMG
Erythrotrichia carnea	ercar	0.1	0.1	0.1	0.1
Acrochaetium cheminii	acche	0	0.1	0.1	0.07
Acrochaetium daviesii	acdav	0.1	0.1	0.1	0.1
Asparagopsis armata	asarm	15	2.5	2.5	6.67
Falkenbergia rufolanosa	faruf	2.5	2.5	2.5	2.5
Dasya rigidula	darig	0.1	0.1	0.1	0.1
Taenioma nanum	tanan	2.5	2.5	0	1.67
Chondria coerulescens	chcoe	0	0.1	0.1	0.07
Chondria tenuissima	chten	0.1	0.1	0.1	0.1
Digenea simplex	disim	2.5	2.5	0.1	1.7
Halopithy incurvus	hainc	0	2.5	2.5	1.67
Herposiphonia seconda f.Seconda	hef.S	0	0	0.1	0.03
Herposiphonia seconda f. tenella	heten	0	0.1	0	0.03
Lophocladia lallemandii	lolal	0.1	0.1	0	0.07
Boergeseniella fruticulosa	bofru	0.1	0.1	0.1	0.1
Polysiphonia furcellata	pofur	0	0.1	0.1	0.07
Polysiphonia spinulosa	pospi	0	0	0.1	0.03
Amphiroa rigida	amrig	15	2.5	0.1	5.87
Corallina elongata	coelo	15	15	15	15
Corallinaofficinalis	coCor	0	15	2.5	5.83
Jania rubens	jarub	0.1	2.5	2.5	1.7
Hypnea musciformis	hymus	2.5	2.5	2.5	2.5
Grateloupia filicina	grfil	0	0.1	0.1	0.07
Gastroclonium clavatum	gacla	0	0.1	0.1	0.07
Dictyopteris membranacea	dimem	0.1	0.1	2.5	0.9
Dictyopteris divaricata	didiv	0.1	2.5	2.5	1.7
Asperococcus bullosus	asbul	0	0	0.1	0.03
Feldmannia globifera	feglo	0	0.1	0.1	0.07
Colpomenia peregrina	coper	0.1	0.1	0.1	0.1
Colpomenia sinuosa	cosin	0.1	0.1	0	0.07
Bryopsis hypnoides	brhyp	0	0	0.1	0.03
Bryopsis muscosa	brmus	0	0.1	0	0.03
Bryopsis plumosa	brplu	0.1	0.1	0	0.07
Bryopsis secunda	brsec	0.1	0.1	0	0.07
Caulerpa prolifera	capro	2.5	2.5	2.5	2.5
Caulerpa racemosa	carac	15	15	2.5	10.83
Codium bursa	cobur	0	2.5	0	0.83
Codium effusum	coeff	2.5	2.5	0	1.67
Codium fragile	cofra	15	2.5	0.1	5.87
Codium tomentosum	cotom	0	0.1	2.5	0.87
Chaetomorpha aerea	chaer	2.5	2.5	2.5	2.5
Chaetomorpha mediterranea	chmed	0	2.5	2.5	1.67
Chaetomorpha chlorotica	chchl	0	2.5	2.5	1.67
Cladophora coelothrix	clcoe	0	2.5	0	0.83
Cladophora laetevirens	cllae	2.5	0	0	0.83
Cladophora prolifera	clpro	2.5	2.5	2.5	2.5
Cladophoropsis modonensis	clmod	0.1	0.1	0.1	0.1
cladophora rupestris	clrup	0	0	2.5	0.83
Bldingia marginata	blmar	0.1	0.1	0.1	0.1
Enteromorpha compressa	encom	2.5	2.5	2.5	2.5
Enteromorpha intestinalis	enint	15	2.5	2.5	6.67
Enteromorpha linza	enlin	0.1	0.1	0.1	0.1
Enteromorpha prolifera	enpro	0.1	0.1	0.1	0.1
Enteromorpha muscoides	enmus	0	0	0.1	0.03
Ulva fasciata	ulfas	0.1	0.1	0.1	0.1
Ulva lactuca	ullac	2.5	2.5	2.5	2.5
Ulva rigida	ulrig	15	2.5	2.5	6.67
