# Supplementary material for: Impacts of the invasive species Caulerpa cylindracea Sonder, 1845 on the algae flora of the west coast of Algeria
Source: Biodivers Data J. 2021 May 26;9:e64535. doi: 10.3897/BDJ.9.e64535 (PMC8175330; doi:10.3897/BDJ.9.e64535)
Supplement: Supplementary material 3 — taxonomic classification of the species recorded [file bdj-09-e64535-s003.csv]

Code	Genre	Famille	Ordre	Classe	Phylum	S. RŠgne	RŠgne
acace	Acetabularia	Polyphysaceaeÿ	Dasycladalesÿ	Ulvophyceae	Chlorophytaÿ	Viridaeplantae	Plantae
acche	Acrochaetium	Acrochaetiaceaeÿ	Rhodymeniophycidae	Florideophyceae	Rhodophyta	Biliphytaÿ	Plantae
acdav	Acrochaetium	Acrochaetiaceaeÿ	Rhodymeniophycidae	Florideophyceae	Rhodophyta	Biliphytaÿ	Plantae
amrig	Amphiroa	Corallinaceae	Corallinalesÿ	Florideophyceae	Rhodophytaÿ	Biliphytaÿ	Plantae
anten	Anotrichium	Wrangeliaceae	Ceramiales	Florideophyceae	Rhodophytaÿ	Biliphytaÿ	Plantae
analg	Antithamnion	Ceramiaceae	Ceramiales	Florideophyceae	Rhodophytaÿ	Biliphytaÿ	Plantae
asarm	Asparagopsis	Ceramiaceaeÿ	Ceramiales	Florideophyceae	Rhodophytaÿ	Biliphytaÿ	Plantae
asbul	Asperococcus	Chordariaceae	Ectocarpales	Phaeophyceae	Ochrophyta	Harosa	Chromistaÿ
blmar	Bldingia	Kornmanniaceae	Ulvales	Ulvophyceae	Chlorophyta	Viridaeplantaeÿ	Plantae
bofru	Boergeseniella	Rhodomelaceae	Ceramialesÿ	Florideophyceae	Rhodophytaÿ	Biliphytaÿ	Plantae
boboe	Botryocladia	Rhodymeniaceaeÿ	Rhodymenialesÿ	Florideophyceae	Rhodophytaÿ	Biliphytaÿ	Plantae
brdup	Bryopsis	Bryopsidaceae	Bryopsidales	Ulvophyceae	Chlorophytaÿ	Viridaeplantae	Plantaeÿ
brhyp	Bryopsis	Bryopsidaceae	Bryopsidales	Ulvophyceae	Chlorophytaÿ	Viridaeplantae	Plantaeÿ
brmus	Bryopsis	Bryopsidaceae	Bryopsidales	Ulvophyceae	Chlorophytaÿ	Viridaeplantae	Plantaeÿ
brplu	Bryopsis	Bryopsidaceae	Bryopsidales	Ulvophyceae	Chlorophytaÿ	Viridaeplantae	Plantaeÿ
brsec	Bryopsis	Bryopsidaceae	Bryopsidales	Ulvophyceae	Chlorophytaÿ	Viridaeplantae	Plantaeÿ
capro	Caulerpa	Caulerpaceae	Bryopsidales	Ulvophyceae	Chlorophytaÿ	Viridaeplantae	Plantaeÿ
carac	Caulerpa	Caulerpaceae	Bryopsidales	Ulvophyceae	Chlorophytaÿ	Viridaeplantae	Plantaeÿ
cecla	Centrocera	Ceramiaceaeÿ	Ceramiales	Florideophyceae	Rhodophytaÿ	Biliphytaÿ	Plantae
cedia	Ceramium	Ceramiaceaeÿ	Ceramiales	Florideophyceae	Rhodophytaÿ	Biliphytaÿ	Plantae
ceord	Ceramium	Ceramiaceaeÿ	Ceramiales	Florideophyceae	Rhodophytaÿ	Biliphytaÿ	Plantae
chaer	Chaetomorpha	Cladophoraceae	Cladophorales	Ulvophyceae	Chlorophyta	Viridaeplantaeÿ	Plantae
chchl	Chaetomorpha	Cladophoraceae	Cladophorales	Ulvophyceae	Chlorophyta	Viridaeplantaeÿ	Plantae
chmed	Chaetomorpha	Cladophoraceae	Cladophorales	Ulvophyceae	Chlorophyta	Viridaeplantaeÿ	Plantae
chaci	Chondracanthus	Gigartinaceae	Gigartinales	Florideophyceae	Rhodophytaÿ	Biliphytaÿ	Plantae
chcoe	Chondria	Rhodomelaceae	Ceramiales	Florideophyceae	Rhodophytaÿ	Biliphytaÿ	Plantae
chdas	Chondria	Rhodomelaceae	Ceramiales	Florideophyceae	Rhodophytaÿ	Biliphytaÿ	Plantae
chmai	Chondria	Rhodomelaceae	Ceramiales	Florideophyceae	Rhodophytaÿ	Biliphytaÿ	Plantae
chten	Chondria	Rhodomelaceae	Ceramiales	Florideophyceae	Rhodophytaÿ	Biliphytaÿ	Plantae
clcoe	Cladophora	Cladophoraceae	Cladophoralesÿ	Ulvophyceae	Chlorophyta	Viridaeplantaeÿ	Plantae
cllae	Cladophora	Cladophoraceae	Cladophoralesÿ	Ulvophyceae	Chlorophyta	Viridaeplantaeÿ	Plantae
clpro	Cladophora	Cladophoraceae	Cladophoralesÿ	Ulvophyceae	Chlorophyta	Viridaeplantaeÿ	Plantae
clrup	Cladophora	Cladophoraceae	Cladophoralesÿ	Ulvophyceae	Chlorophyta	Viridaeplantaeÿ	Plantae
clmod	Cladophoropsis	Boodleaceae	Siphonocladalesÿ	Ulvophyceae	Chlorophyta	Viridaeplantaeÿ	Plantae
clmed	Cladosiphon	Chordariaceaeÿ	Ectocarpalesÿ	Phaeophyceaeÿ	Ochrophytaÿ	Harosa	Chromistaÿ
clspo	Cladostephus	Cladostephaceaeÿ	Sphacelariales	Phaeophyceaeÿ	Ochrophytaÿ	Harosa	Chromistaÿ
cobur	Codium	Codiaceaeÿ	Bryopsidalesÿ	Ulvophyceae	Chlorophyta	Viridaeplantaeÿ	Plantae
coeff	Codium	Codiaceaeÿ	Bryopsidalesÿ	Ulvophyceae	Chlorophyta	Viridaeplantaeÿ	Plantae
cofra	Codium	Codiaceaeÿ	Bryopsidalesÿ	Ulvophyceae	Chlorophyta	Viridaeplantaeÿ	Plantae
cotom	Codium	Codiaceaeÿ	Bryopsidalesÿ	Ulvophyceae	Chlorophyta	Viridaeplantaeÿ	Plantae
coper	Colpomenia	Scytosiphonaceaeÿ	Scytosiphonalesÿ	Phaeophyceaeÿ	Ochrophytaÿ	Harosa	Chromistaÿ
cosin	Colpomenia	Scytosiphonaceaeÿ	Scytosiphonalesÿ	Phaeophyceaeÿ	Ochrophytaÿ	Harosa	Chromistaÿ
coelo	Corallina	Corallinaceae	Corallinales	Florideophyceae	Rhodophytaÿ	Biliphytaÿ	Plantae
coCor	Corallina	Corallinaceae	Corallinales	Florideophyceae	Rhodophytaÿ	Biliphytaÿ	Plantae
cuads	Cutleria	Cutleriaceae	Cutlerialesÿ	Phaeophyceaeÿ	Ochrophytaÿ	Harosa	Chromistaÿ
cyalg	Cystoseira	Sargassaceaeÿ	Fucalesÿ	Phaeophyceaeÿ	Ochrophytaÿ	Harosa	Chromistaÿ
cybar	Cystoseira	Sargassaceaeÿ	Fucalesÿ	Phaeophyceaeÿ	Ochrophytaÿ	Harosa	Chromistaÿ
cycae	Cystoseira	Sargassaceaeÿ	Fucalesÿ	Phaeophyceaeÿ	Ochrophytaÿ	Harosa	Chromistaÿ
cycom	Cystoseira	Sargassaceaeÿ	Fucalesÿ	Phaeophyceaeÿ	Ochrophytaÿ	Harosa	Chromistaÿ
cycri	Cystoseira	Sargassaceaeÿ	Fucalesÿ	Phaeophyceaeÿ	Ochrophytaÿ	Harosa	Chromistaÿ
cymed	Cystoseira	Sargassaceaeÿ	Fucalesÿ	Phaeophyceaeÿ	Ochrophytaÿ	Harosa	Chromistaÿ
cysed	Cystoseira	Sargassaceaeÿ	Fucalesÿ	Phaeophyceaeÿ	Ochrophytaÿ	Harosa	Chromistaÿ
cystr	Cystoseira	Sargassaceaeÿ	Fucalesÿ	Phaeophyceaeÿ	Ochrophytaÿ	Harosa	Chromistaÿ
cytam	Cystoseira	Sargassaceaeÿ	Fucalesÿ	Phaeophyceaeÿ	Ochrophytaÿ	Harosa	Chromistaÿ
darig	Dasya	Dasyaceae	Ceramiales	Florideophyceae	Rhodophytaÿ	Biliphytaÿ	Plantae
didiv	Dictyopteris	Dictyotaceae	Dictyotales	Phaeophyceaeÿ	Ochrophytaÿ	Harosa	Chromistaÿ
dimem	Dictyopteris	Dictyotaceae	Dictyotales	Phaeophyceaeÿ	Ochrophytaÿ	Harosa	Chromistaÿ
didic	Dictyota	Dictyotaceaeÿ	Dictyotales	Phaeophyceaeÿ	Ochrophytaÿ	Harosa	Chromistaÿ
difas	Dictyota	Dictyotaceaeÿ	Dictyotales	Phaeophyceaeÿ	Ochrophytaÿ	Harosa	Chromistaÿ
disim	Digenea	Rhodomelaceaeÿ	Ceramiales	Florideophyceae	Rhodophytaÿ	Biliphytaÿ	Plantae
dispi	Dilophus	Dictyotaceaeÿ	Dictyotales	Phaeophyceaeÿ	Ochrophytaÿ	Harosa	Chromistaÿ
ecfas	Ectocarpus	Ectocarpaceae	Ectocarpalesÿ	Phaeophyceaeÿ	Ochrophytaÿ	Harosa	Chromistaÿ
ecpar	Ectocarpus	Ectocarpaceae	Ectocarpalesÿ	Phaeophyceaeÿ	Ochrophytaÿ	Harosa	Chromistaÿ
ecsil	Ectocarpus	Ectocarpaceae	Ectocarpalesÿ	Phaeophyceaeÿ	Ochrophytaÿ	Harosa	Chromistaÿ
encom	Enteromorpha	Ulvaceae	Ulvales	Ulvophyceae	Chlorophyta	Viridaeplantaeÿ	Plantae
enint	Enteromorpha	Ulvaceae	Ulvales	Ulvophyceae	Chlorophyta	Viridaeplantaeÿ	Plantae
enlin	Enteromorpha	Ulvaceae	Ulvales	Ulvophyceae	Chlorophyta	Viridaeplantaeÿ	Plantae
enmus	Enteromorpha	Ulvaceae	Ulvales	Ulvophyceae	Chlorophyta	Viridaeplantaeÿ	Plantae
enpro	Enteromorpha	Ulvaceae	Ulvales	Ulvophyceae	Chlorophyta	Viridaeplantaeÿ	Plantae
ersub	Erythrocladia	Erythrotrichiaceae	Erythropeltidales	Compsopogonophyceae	Rhodophytaÿ	Biliphytaÿ	Plantae
ercar	Erythrotrichia	Erythrotrichiaceaeÿ	Erythropeltidales	Compsopogonophyceae	Rhodophytaÿ	Biliphytaÿ	Plantae
faruf	Falkenbergia	Bonnemaisoniaceae	Bonnemaisonialesÿ	Florideophyceae	Rhodophytaÿ	Biliphytaÿ	Plantae
feglo	Feldmannia	Acinetosporaceaeÿ	Ectocarpales	Phaeophyceaeÿ	Ochrophytaÿ	Harosa	Chromistaÿ
fesim	Feldmannia	Acinetosporaceaeÿ	Ectocarpales	Phaeophyceaeÿ	Ochrophytaÿ	Harosa	Chromistaÿ
gacla	Gastroclonium	Champiaceaeÿ	Rhodymeniales	Florideophyceae	Rhodophytaÿ	Biliphytaÿ	Plantae
geram	Gelidiella	Gelidiellaceae	Gelidiales	Florideophyceae	Rhodophytaÿ	Biliphytaÿ	Plantae
gecri	Gelidium	Gelidiellaceae	Gelidiales	Florideophyceae	Rhodophytaÿ	Biliphytaÿ	Plantae
gelat	Gelidium	Gelidiellaceae	Gelidiales	Florideophyceae	Rhodophytaÿ	Biliphytaÿ	Plantae
geses	Gelidium	Gelidiellaceae	Gelidiales	Florideophyceae	Rhodophytaÿ	Biliphytaÿ	Plantae
gitee	Gigartina	Gigartinaceaeÿ	Gigartinales	Florideophyceae	Rhodophytaÿ	Biliphytaÿ	Plantae
grbur	Gracilaria	Gracilariaceaeÿ	Gracilariales	Florideophyceae	Rhodophytaÿ	Biliphytaÿ	Plantae
grver	Gracilaria	Gracilariaceaeÿ	Gracilariales	Florideophyceae	Rhodophytaÿ	Biliphytaÿ	Plantae
grfil	Grateloupia	Halymeniaceae	Halymeniales	Florideophyceae	Rhodophytaÿ	Biliphytaÿ	Plantae
hainc	Halopithy	Rhodomelaceae	Ceramiales	Florideophyceae	Rhodophytaÿ	Biliphytaÿ	Plantae
heten	Herposiphonia	Rhodomelaceaeÿ	Ceramiales	Florideophyceae	Rhodophytaÿ	Biliphytaÿ	Plantae
hef.S	Herposiphonia	Rhodomelaceaeÿ	Ceramiales	Florideophyceae	Rhodophytaÿ	Biliphytaÿ	Plantae
himit	Hincksia	Acinetosporaceae	Ectocarpalesÿ	Phaeophyceae	Ochrophyta	Harosaÿ	Chromistaÿ
hisan	Hincksia	Acinetosporaceaeÿ	Ectocarpales	Phaeophyceae	Ochrophytaÿ	Harosa	Chromistaÿ
hymus	Hypnea	Cystocloniaceaeÿ	Gigartinalesÿ	Florideophyceaeÿ	Rhodophytaÿ	Biliphytaÿ	Plantae
jalon	Jania	Corallinaceaeÿ	Corallinalesÿ	Florideophyceaeÿ	Rhodophytaÿ	Biliphytaÿ	Plantae
jarub	Jania	Corallinaceaeÿ	Corallinalesÿ	Florideophyceaeÿ	Rhodophytaÿ	Biliphytaÿ	Plantae
lamic	Laurencia	Rhodomelaceaeÿ	Ceramialesÿ	Florideophyceaeÿ	Rhodophytaÿ	Biliphytaÿ	Plantae
laobt	Laurencia	Rhodomelaceaeÿ	Ceramialesÿ	Florideophyceaeÿ	Rhodophytaÿ	Biliphytaÿ	Plantae
lapap	Laurencia	Rhodomelaceaeÿ	Ceramialesÿ	Florideophyceaeÿ	Rhodophytaÿ	Biliphytaÿ	Plantae
livis	Liagora	Liagoraceaeÿ	Nemaliales	Florideophyceae	Rhodophytaÿ	Biliphyta	Plantae
lolal	Lophocladia	Rhodomelaceae	Ceramialesÿ	Florideophyceaeÿ	Rhodophytaÿ	Biliphytaÿ	Plantae
mygra	Myriactula	Chordariaceae	Ectocarpalesÿ	Phaeophyceae	Ochrophyta	Harosaÿ	Chromistaÿ
myrig	Myriactula	Chordariaceae	Ectocarpales	Phaeophyceae	Ochrophytaÿ	Harosaÿ	Chromista
myriv	Myriactula	Chordariaceaeÿ	Ectocarpales	Phaeophyceae	Ochrophyta	Harosaÿ	Chromista
nehel	Nemalion	Liagoraceaeÿ	Nemalialesÿ	Florideophyceaeÿ	Rhodophytaÿ	Biliphytaÿ	Plantaeÿ
papav	padina	Dictyotaceae	Dictyotales	Phaeophyceaeÿ	Ochrophyta	Harosaÿ	Chromistaÿ
pepol	Peyssonnelia	Peyssonneliaceaeÿ	Peyssonneliales	Florideophyceae	Rhodophyta	Biliphyta	Plantae
perub	Peyssonnelia	Peyssonneliaceaeÿ	Peyssonnelialesÿ	Florideophyceae	Rhodophytaÿ	Biliphytaÿ	Plantae
pesqu	Peyssonnelia	Peyssonneliaceaeÿ	Peyssonneliales	Florideophyceae	Rhodophyta	Biliphyta	Plantaeÿ
pofur	Polysiphonia	Rhodomelaceae	Ceramialesÿ	Florideophyceae	Rhodophytaÿ	Biliphytaÿ	Plantae
pospi	Polysiphonia	Rhodomelaceaeÿ	Ceramiales	Florideophyceae	Rhodophytaÿ	Biliphyta	Plantae
poleu	Porphyra	Bangiaceae	Bangialesÿ	Bangiophyceaeÿ	Rhodophytaÿ	Biliphyta	Plantae
poumb	Porphyra	Bangiaceaeÿ	Bangiales	Bangiophyceae	Rhodophyta	Biliphyta	Plantae
ptcap	Pterocladia	Pterocladiaceae	Gelidialesÿ	Florideophyceae	Rhodophytaÿ	Biliphytaÿ	Plantae
raver	Ralfsia	Ralfsiaceaeÿ	Ralfsiales	Phaeophyceaeÿ	Ochrophytaÿ	Harosa	Chromista
river	Rissoella	Rissoellaceae	Gigartinalesÿ	Florideophyceae	Rhodophyta	Biliphytaÿ	Plantaeÿ
saaci	Sargassum	Sargassaceaeÿ	Fucalesÿ	Phaeophyceae	Ochrophytaÿ	Harosaÿ	Chromistaÿ
savul	Sargassum	Sargassaceae	Fucales	Phaeophyceae	Ochrophyta	Harosaÿ	Chromista
spcir	Sphacelaria	Sphacelariaceae	Sphacelarialesÿ	Phaeophyceae	Ochrophytaÿ	Harosaÿ	Chromista
spplu	Sphacelaria	Sphacelariaceaeÿ	Sphacelarialesÿ	Phaeophyceaeÿ	Ochrophyta	Harosa	Chromistaÿ
spcor	Sphaerococcus	Sphaerococcaceae	Gigartinales	Florideophyceae	Rhodophytaÿ	Biliphytaÿ	Plantae
spfil	Spyridia	Spyridiaceaeÿ	Ceramiales	Florideophyceae	Rhodophyta	Biliphytaÿ	Plantaeÿ
stsco	Stypocaulon	Stypocaulaceaeÿ	Sphacelarialesÿ	Phaeophyceaeÿ	Ochrophytaÿ	Harosa	Chromistaÿ
tanan	Taenioma	Delesseriaceaeÿ	Ceramialesÿ	Florideophyceae	Rhodophytaÿ	Biliphytaÿ	Plantaeÿ
ulfas	Ulva	Ulvaceaeÿ	Ulvales	Ulvophyceaeÿ	Chlorophyta	Viridaeplantaeÿ	Plantaeÿ
ullac	Ulva	Ulvaceae	Ulvalesÿ	Ulvophyceae	Chlorophyta	Viridaeplantaeÿ	Plantaeÿ
ulrig	Ulva	Ulvaceae	Ulvalesÿ	Ulvophyceae	Chlorophyta	Viridaeplantaeÿ	Plantaeÿ
